# Supplementary material
Source: PubMed Central journal article supplement (PMC3083214)

YY1 as a *DFNA11 MYO7A* Auditory Genetic Modifier

**FIGURE S1. Low Magnification of Cochlear Region Presented in Fig. 6.** The boxed area represents a cross-section through an extreme apical cochlear turn. YY1 (red), parvalbumin (green), DAPI (blue). SM, scala media, ST, scala tympani. High magnification images from the boxed area are detailed in Fig. 6. Scale bar = 100  $\mu$ m.

## Supplemental Fig. 1

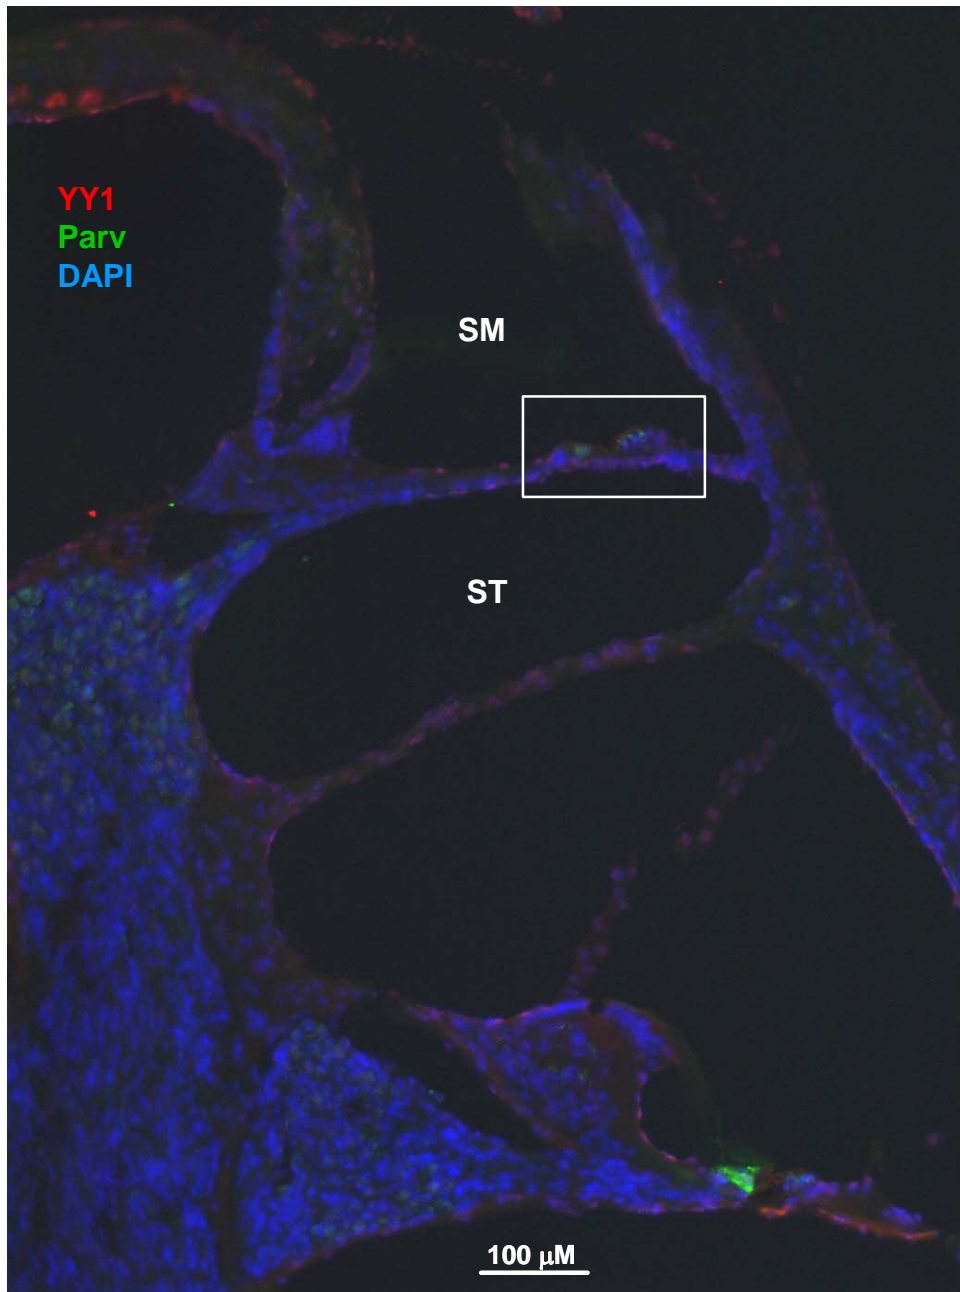

Supplement: supp_M111.228304_jbc.M111.228304-1.pdf [file supp_M111.228304_jbc.M111.228304-1.pdf]
